# Supplementary material
Source: publisher figshare collection journal article supplement (https://tandf.figshare.com/articles/dataset/_/11764002)
Supplement: Supplementary file 1 [file 1 › tbio_a_1714479_sm3898.pdf]

## Principal components by site

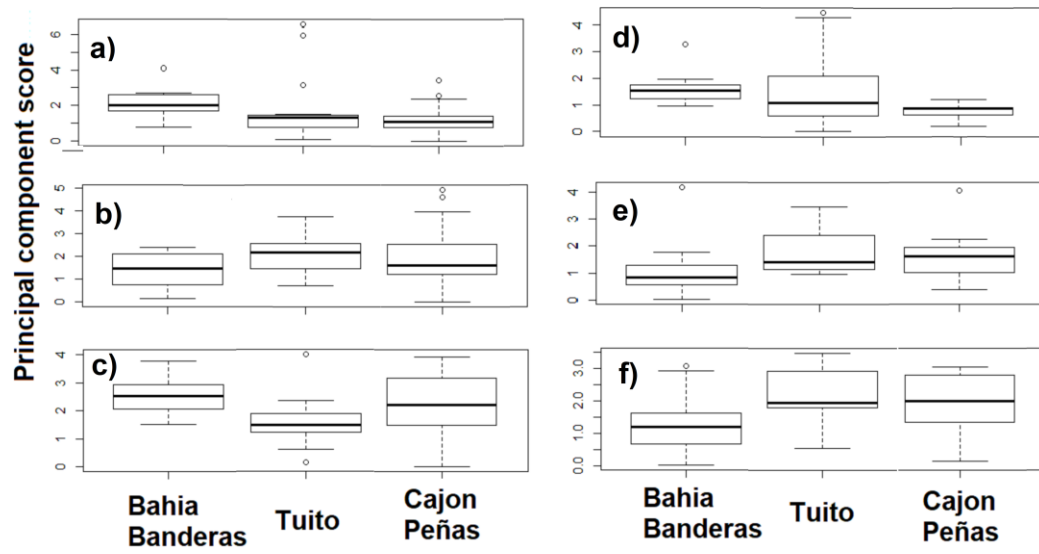

**Supplementary Figure S2.** Boxplots of Principal Components One (a, d) Two (b, e) and Three (c, f) of Military Macaw flight contact vocalizations for the complete dataset (a, b, and c) and the reduced dataset (d, e, and f).
