# Supplementary material
Source: publisher figshare collection journal article supplement (https://tandf.figshare.com/articles/dataset/_/11764002)
Supplement: Supplementary file 1 [file 1 › tbio_a_1714479_sm3913.pdf]

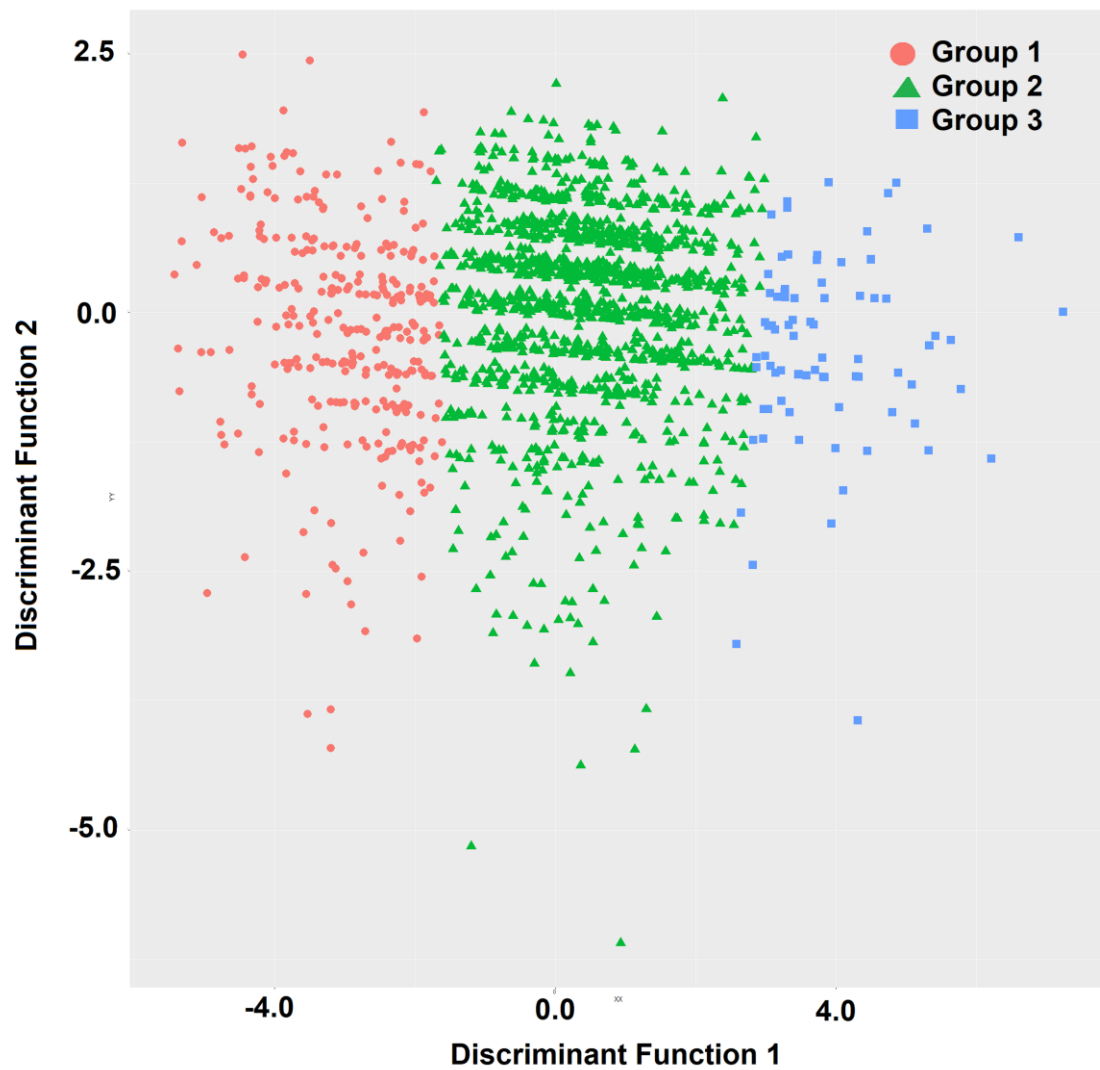

**Supplementary Figure S1.** Discriminant Function Analysis groupings of all Military Macaw vocalizations recorded at three sites in Coastal Jalisco. Vocalizations from group two, which contained the largest number of vocalizations, were used in analyses.
